# Supplementary material for: Neuronal connectivity between habenular glutamate‐kisspeptin1 co‐expressing neurons and the raphe 5‐HT system
Source: PubMed Central journal article supplement — J Neurochem. 2015 Sep 10;135(4):814–29. doi: 10.1111/jnc.13273 (PMC5049628; doi:10.1111/jnc.13273), 2015-09-10
Supplement: JNC-135-814-s001.pdf [file JNC-135-814-s001.pdf]

**Neuronal Connectivity between Habenular Glutamate-Kisspeptin1 Co-expressing Neurons  
and the Raphe 5-HT System**

Fatima M. Nathan, Satoshi Ogawa and Ishwar S. Parhar

*Brain Research Institute, School of Medicine and Health Sciences, Monash University Malaysia,  
PJ 47500, Malaysia.*

**SUPPORTING INFORMATION**

**Figure S1**

**Figure S2**

**Figure S3**

**Figure S4**

**Table S1**

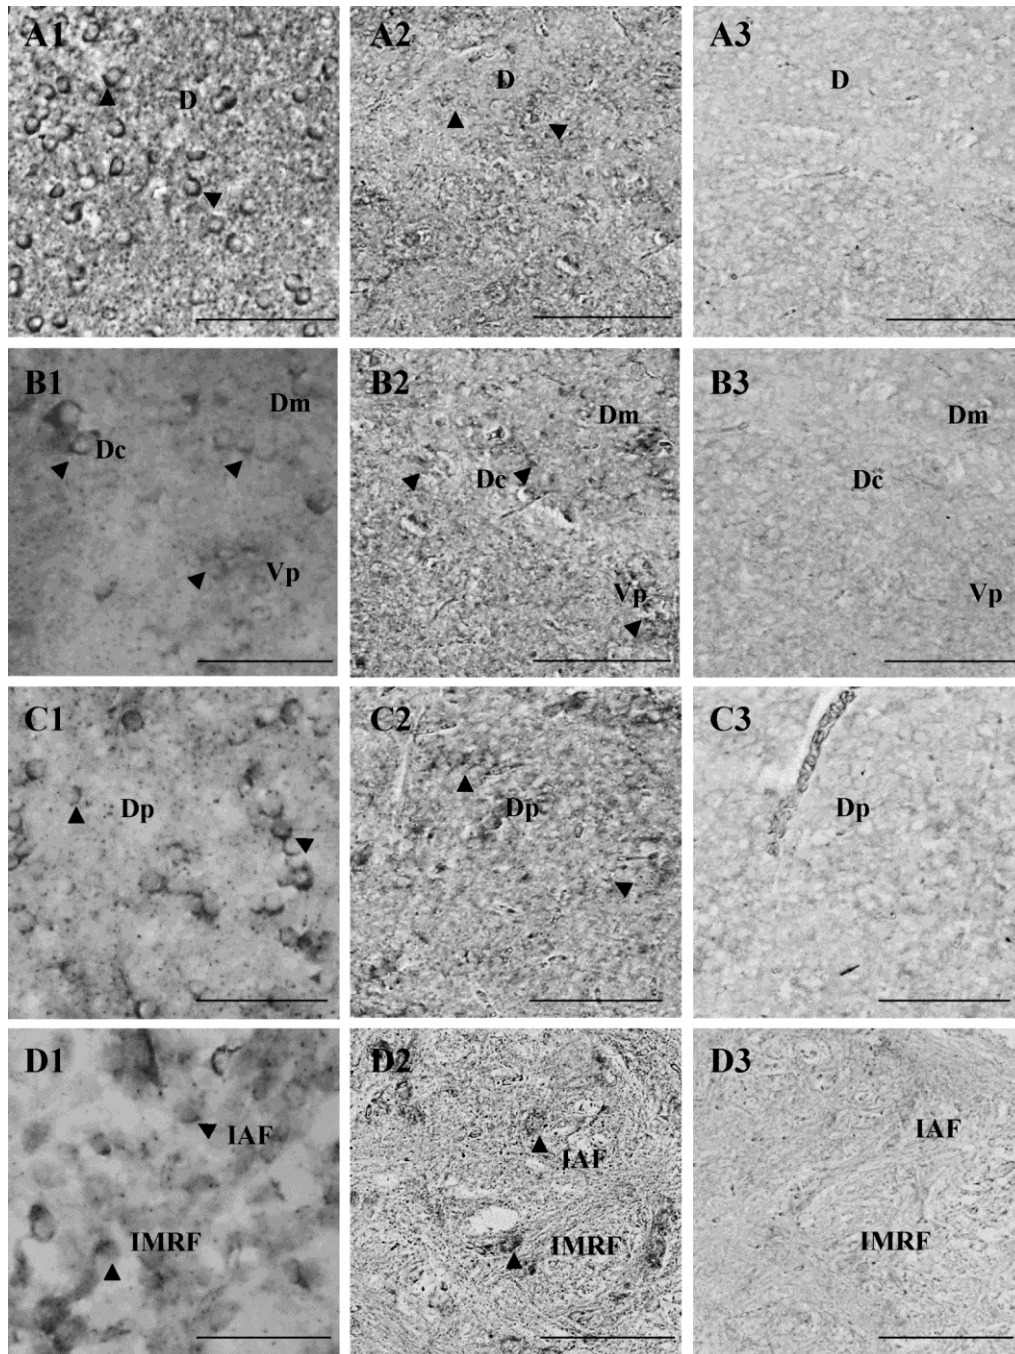

**Figure S1: Kiss-R1-ir localization and *KRBDP2* expression in other regions of the zebrafish brain.** A1-D1, Kiss-R1-immunoreactive (-ir) cell somata observed outside of the habenula such as the dorsal telencephalic area (A1), central, medial (B1) and posterior (C1) zone of dorsal telencephalic area, postcommissural nucleus of ventral of the ventral telencephalic area (B1), inner arcuate nucleus and intermediate reticular formation (D1). A2-D2, *KRBDP2* mRNA expression was also observed in same regions as Kiss-R1-ir cells. A3-D3, The sense riboprobe showed no expression of *KRBDP2* mRNA. For abbreviations, see Table 2. Scale bars, 100  $\mu$ m.

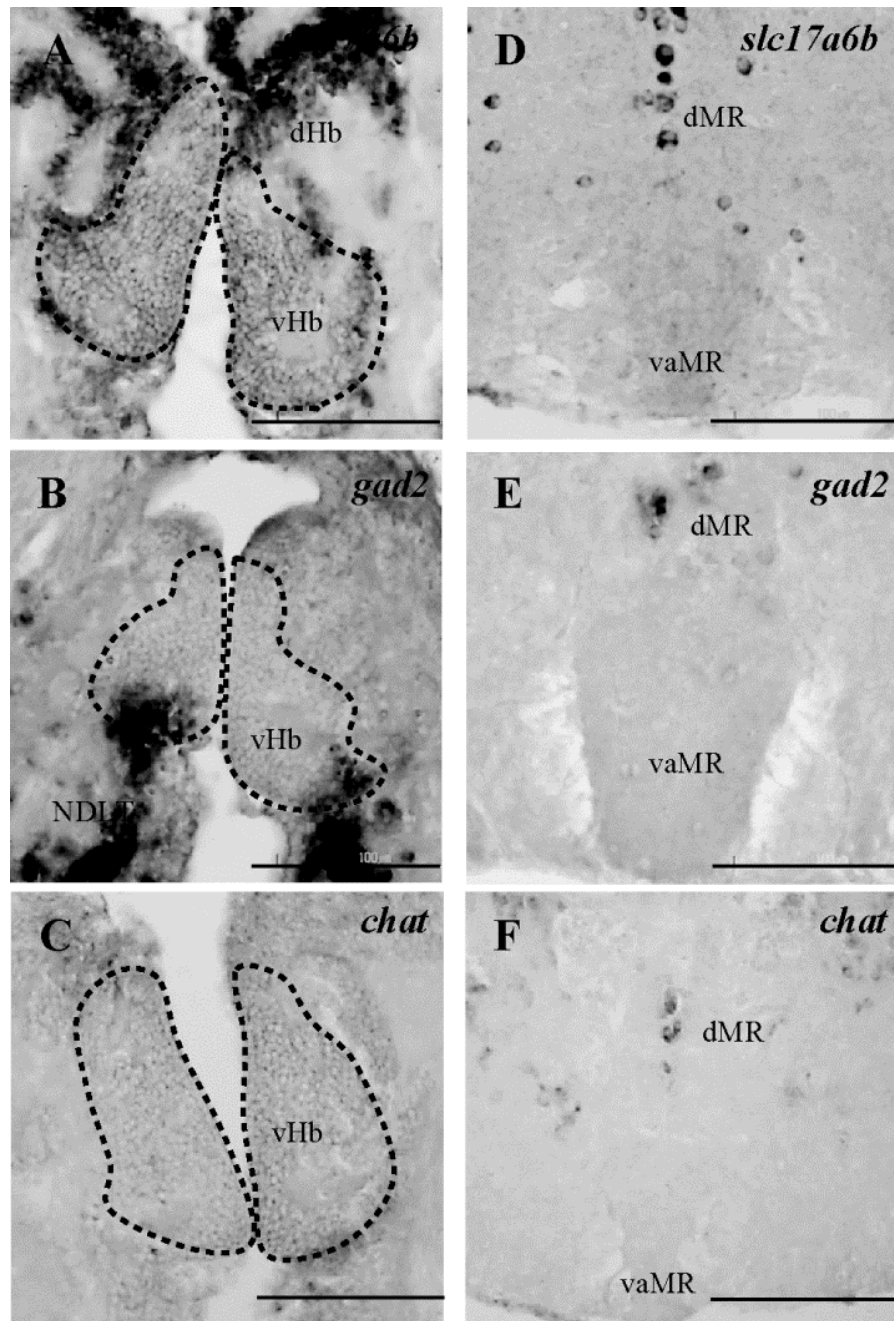

**Figure S2: Expression of *slc17a6b*, *gad2* and *chat* mRNAs in the habenula and raphe regions.** A and D, *slc17a6b* mRNA was noted in some population of cells in the vHb and in the dMR and sparsely in the DR. B and E, *gad2* mRNA expressing cells was observed as a minute population in the ventral region of the vHb and in the dMR. C and F, *chat* mRNA was weakly present in the vHb with some cells in the dMR and DR. Scale bars, 100  $\mu$ m.

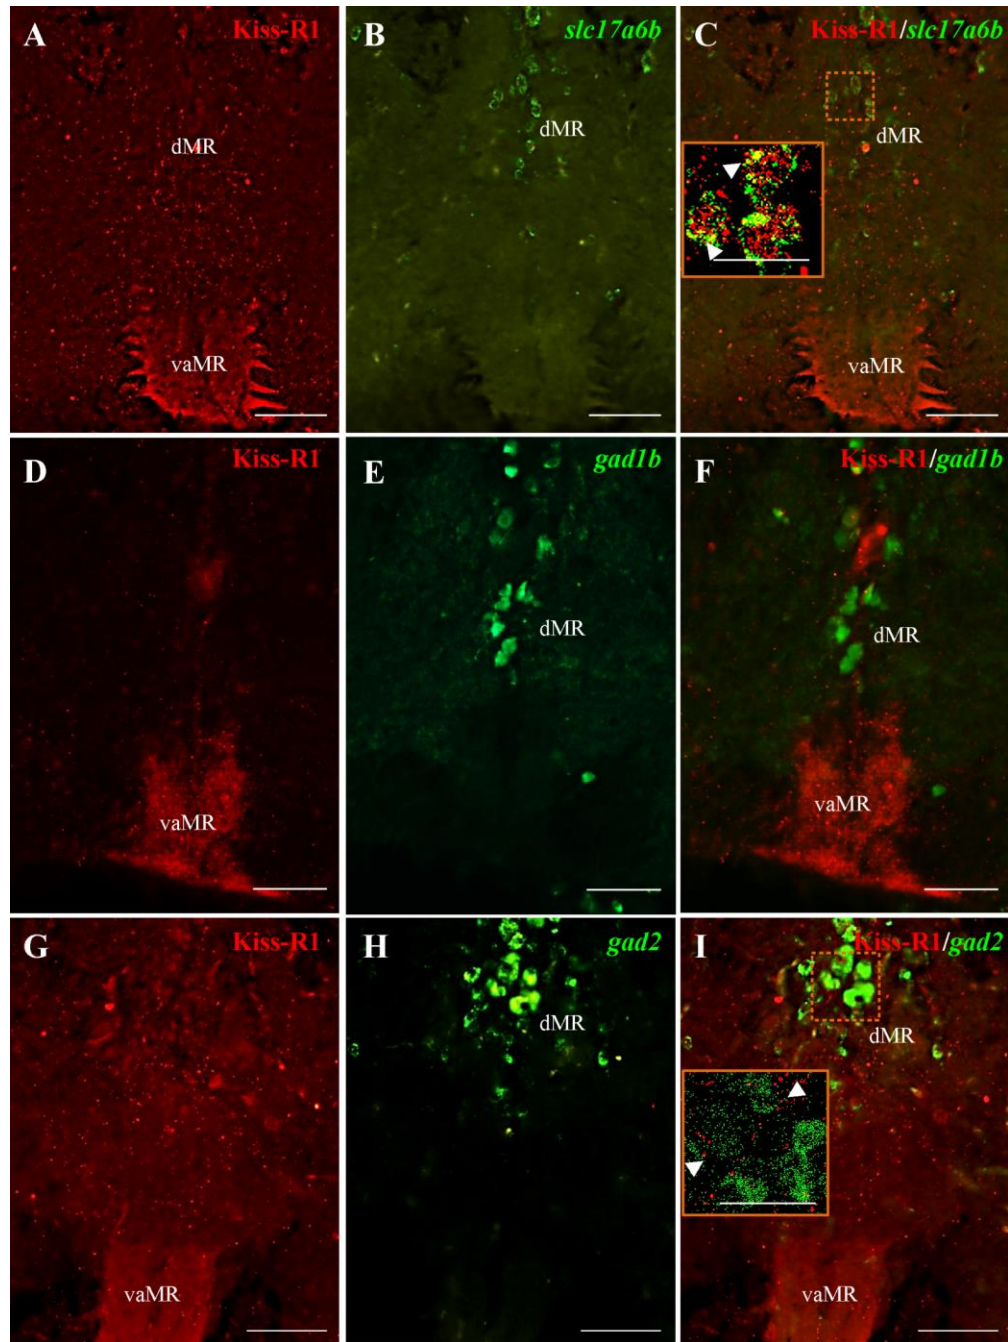

**Figure S3: Dual-fluorescence labeling of Kiss-R1 (red) in glutamatergic and GABAergic neurons (green) in raphe nuclei.** A-C: Kiss-R1-immunoreactivity co-expressed with *slc17a6b*-expressing cells as denoted by the confocal image (inset C; 79.8X; N.A. = 1.4; z-step 0.15  $\mu\text{m}$ ). D-F: GFP-labeled *Gad1b* neurons were only observed in the dMR with no close associations observed with Kiss-R1 fibers. G-I: There was no co-localization of Kiss-R1 with *gad2*-expressing cells, but Kiss-R1-ir fibers were noted within close proximity in the dMR. Presence of actual space of at least 0.15  $\mu\text{m}$  noted between fibers and cells (inset I). Scale bars, A-F: 100  $\mu\text{m}$  and inset C and I: 50  $\mu\text{m}$ .

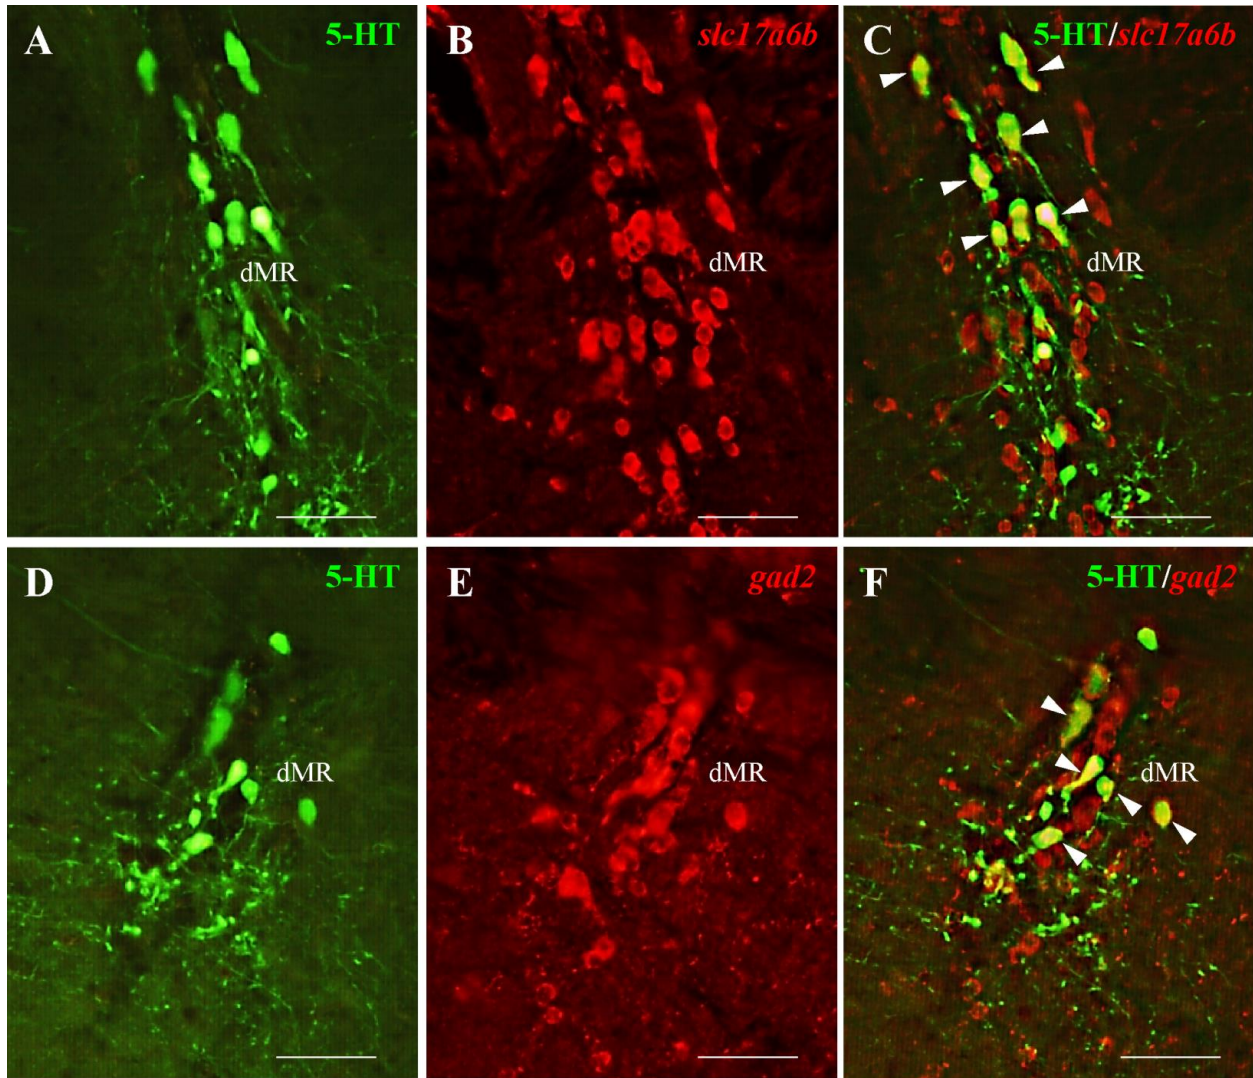

**Figure S4: Co-expression of *slc17a6b* and *gad2* (red) with 5-HT (green).** In the raphe nuclei, some 5-HT neurons co-express both *slc17a6b* (A-C) and *gad2* (D-F). Scale bars, 100 μm.

**Table S1: Gene abbreviations, the primer sequences, probe size and GenBank accession numbers for probes for DIG-*in situ* hybridization**

| <b>Gene abbreviation</b> | <b>Gene name</b>                                                                                                                                                              | <b>Nucleotide sequence (5' - 3') of primers used for probe synthesis</b> | <b>Probe size (nt)</b> | <b>DDBJ/EMBL/Gen Bank Accession Number</b> |
|--------------------------|-------------------------------------------------------------------------------------------------------------------------------------------------------------------------------|--------------------------------------------------------------------------|------------------------|--------------------------------------------|
| kissr1                   | Kisspeptin receptor1                                                                                                                                                          | Forward: GTCTGATGGCAGAACTAAC<br>Reverse: CAGAGGTCAGGATGAAAGAA            | 1106                   | EU 047918                                  |
| KRBDP2                   | <i>kissr1b</i> -derived protein 2                                                                                                                                             | Forward: TATGTGTGCGCTGGTCAATTATC<br>Reverse: TCAGGATGAAAGAAAGTTCATCTC    | 720                    | HQ 222885                                  |
| slc17a6b                 | solute carrier family 17 sodium-dependent inorganic phosphate cotransporter member 6b transcript variant 2, also known as vesicular glutamate transporter 2 ( <i>vglut2</i> ) | Forward: TGTCGGCTTCAGTGGATTTG<br>Reverse: ACTCCTCTCGTTTATCCCATCCT        | 437                    | NM_001005398.1                             |
| gad1b                    | glutamic acid decarboxylase 1b                                                                                                                                                | Forward: TGTGAACCATCCTCCGTGTG<br>Reverse: AGTAGATCTCGCGCGAACAG           | 405                    | NM_194419.1                                |
| gad2                     | glutamic acid decarboxylase 2                                                                                                                                                 | Forward: TACCTGCACTGGACGGAGAC<br>Reverse: GGTGTTTCCGGGACATTAGC           | 840                    | NM_001017708.2                             |
| chat                     | choline acetyltransferase                                                                                                                                                     | Forward: TGTTTGTGTCTGGTGTGTTT<br>Reverse: AGCATCAGGGCTCATTTTCT           | 450                    | NM_001130719.1                             |
